# Supplementary material
Source: PubMed Central journal article supplement (PMC2762118)
Supplement: NIHMS134509-supplement-Supp_Tables_S1-S8.pdf [file NIHMS134509-supplement-Supp_Tables_S1-S8.pdf]

**Table S1. Effect of *skn-1* RNAi on Genes Up-Regulated by Oxidative Stress<sup>a</sup>**

| Sequence Name                    | Gene Name <sup>b</sup>                               | Gene Symbol      | Fold $\Delta^c$ | <i>P</i> <sup>d</sup> | % <i>skn-1</i> <sup>e</sup> |
|----------------------------------|------------------------------------------------------|------------------|-----------------|-----------------------|-----------------------------|
| <b>Antioxidant Response</b>      |                                                      |                  |                 |                       |                             |
| Y54G11A.5                        | catalase 2, peroxisomal                              | <i>ctl-2</i>     | 2.7             | 0.001                 | 80*                         |
| Y54G11A.13                       | catalase 3                                           | <i>ctl-3</i>     | 2.8             | 0.001                 | 0                           |
| C15F1.7                          | superoxide dismutase 1                               | <i>sod-1</i>     | 1.4             | 0.007                 | 100*                        |
| ZK637.10                         | thioredoxin reductase 2                              | <i>trxr-2</i>    | 1.4             | 0.017                 | -42                         |
| R03G5.5                          | <i>glutathione peroxidase</i>                        |                  | 3.0             | 0.000                 | 68*                         |
| F26E4.12                         | <i>glutathione peroxidase</i>                        |                  | 1.7             | 0.004                 | 100*                        |
| C46F11.2                         | <i>pyridine nucleotide-disulphide oxidoreductase</i> |                  | 1.2             | 0.021                 | 76                          |
| <b>Glutathione S-transferase</b> |                                                      |                  |                 |                       |                             |
| R107.7                           | glutathione S-transferase 1                          | <i>gst-1</i>     | 1.7             | 0.001                 | 53                          |
| K08F4.7                          | glutathione S-transferase 4                          | <i>gst-4</i>     | 12.4            | 0.000                 | 79*                         |
| R03D7.6                          | glutathione S-transferase 5                          | <i>gst-5</i>     | 5.4             | 0.027                 | 60                          |
| F11G11.3                         | glutathione S-transferase 6                          | <i>gst-6</i>     | 4.8             | 0.004                 | 41                          |
| R05F9.5                          | glutathione S-transferase 9                          | <i>gst-9</i>     | 9.2             | 0.009                 | 64                          |
| Y45G12C.2                        | glutathione S-transferase 10                         | <i>gst-10</i>    | 3.0             | 0.000                 | 100*                        |
| Y45G12C.2                        | glutathione S-transferase 10                         | <i>gst-10</i>    | 2.9             | 0.000                 | 100*                        |
| F37B1.2                          | glutathione S-transferase 12                         | <i>gst-12</i>    | 9.2             | 0.000                 | 100*                        |
| T26C5.1                          | glutathione S-transferase 13                         | <i>gst-13</i>    | 4.9             | 0.001                 | 100*                        |
| F37B1.3                          | glutathione S-transferase 14                         | <i>gst-14</i>    | 15.9            | 0.000                 | 85*                         |
| F37B1.4                          | glutathione S-transferase 15                         | <i>gst-15</i>    | 6.4             | 0.025                 | 45                          |
| F37B1.5                          | glutathione S-transferase 16                         | <i>gst-16</i>    | 3.7             | 0.002                 | 61                          |
| F21H7.1                          | glutathione S-transferase 22                         | <i>gst-22</i>    | 3.0             | 0.019                 | 4                           |
| Y53F4B.32                        | glutathione S-transferase 29                         | <i>gst-29</i>    | 2.4             | 0.027                 | 69                          |
| ZK546.11                         | glutathione S-transferase 30                         | <i>gst-30</i>    | 20.6            | 0.000                 | 20                          |
| Y53F4B.35                        | glutathione S-transferase 31                         | <i>gst-31</i>    | 3.9             | 0.006                 | 72                          |
| Y53F4B.37                        | glutathione S-transferase 32                         | <i>gst-32</i>    | 18.9            | 0.001                 | 99*                         |
| F35E8.8                          | glutathione S-transferase 38                         | <i>gst-38</i>    | 3.9             | 0.000                 | 100*                        |
| Y53F4B.33                        | glutathione S-transferase 39                         | <i>gst-39</i>    | 6.1             | 0.000                 | 69*                         |
| K10F12.4                         | <i>glutathione S-transferase</i>                     |                  | 1.7             | 0.028                 | -100                        |
| <b>Heat Shock Response</b>       |                                                      |                  |                 |                       |                             |
| T27E4.8                          | heat shock protein 16.1                              | <i>hsp-16.1</i>  | 5.2             | 0.019                 | -36                         |
| Y46H3A.3                         | heat shock protein 16.2                              | <i>hsp-16.2</i>  | 3.7             | 0.001                 | -100                        |
| Y46H3A.2                         | heat shock protein 16.41                             | <i>hsp-16.41</i> | 4.7             | 0.010                 | -100                        |
| T27E4.9                          | heat shock protein 16.49                             | <i>hsp-16.49</i> | 5.7             | 0.000                 | -15                         |
| F08H9.3                          | <i>Unknown</i>                                       |                  | 4.0             | 0.002                 | -53                         |
| F08H9.4                          | <i>Unknown</i>                                       |                  | 3.3             | 0.022                 | 38                          |
| <b>Electron Transport</b>        |                                                      |                  |                 |                       |                             |
| Y54G11A.13                       | catalase 3                                           | <i>ctl-3</i>     | 2.8             | 0.001                 | 0                           |
| K09A11.2                         | cytochrome P450 family 14A1                          | <i>cyp-14A1</i>  | 4.6             | 0.017                 | -80                         |
| K09A11.3                         | cytochrome P450 family 14A2                          | <i>cyp-14A2</i>  | 2.4             | 0.007                 | 71*                         |
| R04D3.1                          | cytochrome P450 family 14A4                          | <i>cyp-14A4</i>  | 13.8            | 0.003                 | -20                         |
| Y5H2B.5                          | cytochrome P450 family 32B1                          | <i>cyp-32B1</i>  | 3.2             | 0.020                 | 82                          |
| R08F11.3                         | cytochrome P450 family 33C8                          | <i>cyp-33C8</i>  | 41.9            | 0.004                 | 56                          |
| T09H2.1                          | cytochrome P450 family 34A4                          | <i>cyp-34A4</i>  | 6.3             | 0.011                 | -33                         |
| B0213.15                         | cytochrome P450 family 34A9                          | <i>cyp-34A9</i>  | 3.1             | 0.018                 | 75                          |
| F01D5.9                          | cytochrome P450 family 37A1                          | <i>cyp-37A1</i>  | 1.9             | 0.006                 | 95                          |
| F28G4.1                          | cytochrome P450 family 37B1                          | <i>cyp-37B1</i>  | 3.5             | 0.001                 | 77                          |
| Y80D3A.5                         | cytochrome P450 family 42A1                          | <i>cyp-42A1</i>  | 3.9             | 0.006                 | 43                          |

|                               |                                                                 |                 |      |       |      |
|-------------------------------|-----------------------------------------------------------------|-----------------|------|-------|------|
| E03E2.1                       | cytochrome P450 family 43A1                                     | <i>cyp-43A1</i> | 5.3  | 0.017 | 72   |
| K08C7.2                       | flavin-containing monooxygenase family 1                        | <i>fmo-1</i>    | 3.5  | 0.023 | 28   |
| F53F4.5                       | flavin-containing monooxygenase family 4                        | <i>fmo-4</i>    | 1.5  | 0.011 | 100  |
| C05E4.9                       | GEX Interacting protein 7                                       | <i>gei-7</i>    | 4.0  | 0.028 | 83   |
| Y34D9A.6                      | glutaredoxin 10                                                 | <i>glrx-10</i>  | 2.2  | 0.001 | 78*  |
| K10B3.9                       | mitochondrial ATPase inhibitor family 1                         | <i>mai-1</i>    | 4.0  | 0.028 | 58   |
| C15H9.1                       | nicotinamide nucleotide transhydrogenase 1                      | <i>nnt-1</i>    | 2.9  | 0.001 | 18   |
| B0222.9                       | <i>xanthine dehydrogenase</i>                                   |                 | 8.0  | 0.001 | 73*  |
| F55B11.1                      | <i>xanthine dehydrogenase</i>                                   |                 | 1.9  | 0.019 | 100  |
| F56D5.3                       | <i>NADH:flavin oxidoreductase/12-oxophytodienoate reductase</i> |                 | 15.5 | 0.000 | 93*  |
| F17A9.4                       | <i>NADH:flavin oxidoreductase/12-oxophytodienoate reductase</i> |                 | 4.9  | 0.000 | 85*  |
| W06H8.2                       | <i>NADH:flavin oxidoreductase/12-oxophytodienoate reductase</i> |                 | 57.3 | 0.007 | 51   |
| W01B11.6                      | <i>Thioredoxin</i>                                              |                 | 4.5  | 0.001 | -54  |
| C35B1.5                       | <i>thioredoxin, nucleoredoxin and related proteins</i>          |                 | 2.4  | 0.000 | 100* |
| F28A10.6                      | <i>medium-chain acyl-CoA dehydrogenase</i>                      |                 | 1.5  | 0.004 | 23   |
| F58F9.7                       | <i>pristanoyl-CoA/acyl-CoA oxidase</i>                          |                 | 2.6  | 0.007 | 51   |
| F41E6.5                       | <i>glycolate oxidase</i>                                        |                 | 3.2  | 0.004 | 36   |
| M153.1                        | <i>pyrroline-5-carboxylate reductase</i>                        |                 | 3.6  | 0.002 | 39   |
| C15B12.1                      | <i>FAD-dependent oxidoreductase</i>                             |                 | 1.9  | 0.030 | 94   |
| C46F11.2                      | <i>pyridine nucleotide-disulphide oxidoreductase</i>            |                 | 1.2  | 0.021 | 76   |
| F47B8.4                       | <i>glutaredoxin-related protein</i>                             |                 | 16.3 | 0.004 | 53   |
| C24G6.6                       | <i>flavin-containing amine oxidase</i>                          |                 | 2.6  | 0.028 | 60   |
| C49G7.10                      | <i>Unknown</i>                                                  |                 | 39.1 | 0.034 | 68   |
| <b>Neuropeptide Signaling</b> |                                                                 |                 |      |       |      |
| Y48D7A.2                      | FMRF-like peptide 18                                            | <i>flp-18</i>   | 2.3  | 0.002 | 17   |
| T23E7.4                       | neuropeptide like protein 6                                     | <i>nlp-6</i>    | 1.2  | 0.028 | -93  |
| F18E9.2                       | neuropeptide like protein 7                                     | <i>nlp-7</i>    | 1.2  | 0.025 | 100* |
| D1009.4                       | neuropeptide like protein 14                                    | <i>nlp-14</i>   | 2.2  | 0.018 | 2    |
| T13A10.5                      | neuropeptide like protein 16                                    | <i>nlp-16</i>   | 2.8  | 0.002 | 59   |
| T03D8.3                       | seven B two homolog 1                                           | <i>sbt-1</i>    | 1.5  | 0.032 | -98  |

<sup>a</sup> This table shows subsets of up-regulated genes involved in selected functional classes. Significant genes and fold change were determined by SAM. Functional classification was determined by DAVID.

<sup>b</sup> The predicted gene titles for unknown genes are shown in Italics.

<sup>c</sup> Fold change under oxidative stress.

<sup>d</sup> Determined by T-test.

<sup>e</sup> % inhibition effect of *skn-1* knockdown.

Negative value means *skn-1* RNAi further increases the expression compared to oxidative-stressed control.

Asterisk (\*) indicates the % effect of *skn-1* knockdown is statistically significant (SAM).

**Table S2. Effect of *skn-1* RNAi on Genes Down-Regulated by Oxidative Stress<sup>a</sup>**

| Sequence Name                     | Gene Name <sup>b</sup>                                                  | Gene Symbol    | Fold $\Delta^c$ | <i>P</i> <sup>d</sup> | % <i>skn-1</i> <sup>e</sup> |
|-----------------------------------|-------------------------------------------------------------------------|----------------|-----------------|-----------------------|-----------------------------|
| <b>Homeostasis</b>                |                                                                         |                |                 |                       |                             |
| B0495.4                           | NA(+)/H(+) exchanger 2                                                  | <i>nhx-2</i>   | 0.3             | 0.000                 | 31*                         |
| T17E9.2                           | N-myristoyl transferase homolog 1                                       | <i>nmt-1</i>   | 0.7             | 0.016                 | 100*                        |
| K04E7.2                           | oligopeptide transporter 2                                              | <i>opt-2</i>   | 0.1             | 0.004                 | 10                          |
| C54H2.5                           | surfeit homolog 4                                                       | <i>sft-4</i>   | 0.6             | 0.016                 | 52*                         |
| Y66H1B.4                          | sphingosine phosphate lyase 1                                           | <i>spl-1</i>   | 0.5             | 0.015                 | 43*                         |
| F55A11.2                          | syntaxin 3                                                              | <i>syn-3</i>   | 0.9             | 0.005                 | 100*                        |
| C16A11.4                          | <i>PHD Zn-finger proteins</i> <sup>6</sup>                              |                | 0.6             | 0.000                 | 73*                         |
| H41C03.1                          | <i>Phosphatidylinositol transfer protein SEC14 and related proteins</i> |                | 0.4             | 0.008                 | 20                          |
| F54C9.6                           | <i>AAA+-type ATPase</i>                                                 |                | 0.8             | 0.004                 | 5                           |
| Y38E10A.24                        | <i>unknown</i>                                                          |                | 0.7             | 0.001                 | -21                         |
| F58G1.4                           | <i>unknown</i>                                                          |                | 0.2             | 0.001                 | -7                          |
| C24G6.8                           | <i>unknown</i>                                                          |                | 0.8             | 0.016                 | 25                          |
| <b>Post-embryonic development</b> |                                                                         |                |                 |                       |                             |
| C53B4.7                           | BT (bacillus thuringiensis) toxin resistant 1                           | <i>bre-1</i>   | 0.7             | 0.008                 | 2                           |
| W05B2.5                           | collagen 93                                                             | <i>col-93</i>  | 0.6             | 0.019                 | -19                         |
| W05B2.1                           | collagen 94                                                             | <i>col-94</i>  | 0.6             | 0.014                 | -43                         |
| W05B2.1                           | collagen 94                                                             | <i>col-94</i>  | 0.6             | 0.019                 | -30                         |
| F30B5.1                           | dumpy: shorter than wild-type 13                                        | <i>dpy-13</i>  | 0.5             | 0.012                 | -54                         |
| F32D8.6                           | endomitotic oocytes 1                                                   | <i>emo-1</i>   | 0.7             | 0.018                 | -29                         |
| T08B2.9                           | phenylalanyl tRNA synthetase 1                                          | <i>frs-1</i>   | 0.8             | 0.020                 | 22                          |
| T21G5.3                           | germ-line helicase 1                                                    | <i>glh-1</i>   | 0.5             | 0.000                 | 20                          |
| T21G5.3                           | germ-line helicase 1                                                    | <i>glh-1</i>   | 0.6             | 0.002                 | 15                          |
| T09A5.10                          | abnormal cell lineage 5                                                 | <i>lin-5</i>   | 0.7             | 0.015                 | 2                           |
| C08B11.4                          | nose resistant to fluoxetine 6                                          | <i>nrf-6</i>   | 0.6             | 0.014                 | 22                          |
| R12C12.2                          | associated with RAN (nuclear import/export) function 5                  | <i>ran-5</i>   | 0.8             | 0.009                 | 94*                         |
| W02B12.2                          | SR protein (splicing factor) 2                                          | <i>rsp-2</i>   | 0.8             | 0.012                 | -34                         |
| F23H12.4                          | squat 3                                                                 | <i>sqt-3</i>   | 0.6             | 0.011                 | -41                         |
| F57B1.2                           | SUN (S. pombe sad1/Ce-UNC-84) domain protein 1                          | <i>sun-1</i>   | 0.7             | 0.003                 | 72*                         |
| R06C7.5                           | <i>adenylosuccinate lyase</i>                                           |                | 0.6             | 0.002                 | 37*                         |
| F28C6.2                           | <i>transcription factor AP-2</i>                                        |                | 0.7             | 0.020                 | 39                          |
| Y19D10A.4                         | <i>unknown</i>                                                          |                | 0.5             | 0.002                 | -41                         |
| F33H1.3                           | <i>unknown</i>                                                          |                | 0.8             | 0.014                 | -35                         |
| F42A8.1                           | <i>unknown</i>                                                          |                | 0.4             | 0.000                 | 57*                         |
| <b>Reproduction</b>               |                                                                         |                |                 |                       |                             |
| C53B4.7                           | BT (bacillus thuringiensis) toxin resistant 1                           | <i>bre-1</i>   | 0.7             | 0.008                 | 2                           |
| T05G5.3                           | cyclin-dependent kinase family 1                                        | <i>cdk-1</i>   | 0.7             | 0.005                 | 71*                         |
| F56D1.7                           | human DAZ (deleted in azoospermia) homolog 1                            | <i>daz-1</i>   | 0.7             | 0.001                 | 14                          |
| B0244.8                           | egg sterile (unfertilizable) 1                                          | <i>egg-1</i>   | 0.7             | 0.005                 | 20                          |
| R08D7.3                           | eukaryotic initiation factor 3D                                         | <i>eif-3.D</i> | 0.7             | 0.001                 | 7                           |
| F32D8.6                           | endomitotic oocytes 1                                                   | <i>emo-1</i>   | 0.7             | 0.018                 | -29                         |
| ZK809.4                           | equilibrative nucleoside transporter 1                                  | <i>ent-1</i>   | 0.6             | 0.009                 | 63*                         |
| Y39A1A.19                         | favin-containing monooxygenase family 3                                 | <i>fmo-3</i>   | 0.3             | 0.000                 | 9                           |
| T08B2.9                           | phenylalanyl tRNA synthetase 1                                          | <i>frs-1</i>   | 0.8             | 0.020                 | 22                          |
| T23G11.3                          | defective in germ line development 1                                    | <i>gld-1</i>   | 0.8             | 0.018                 | 49                          |
| T21G5.3                           | germ-line helicase 1                                                    | <i>glh-1</i>   | 0.5             | 0.000                 | 20                          |
| C34E10.2                          | gro-1 operon gene 2                                                     | <i>gop-2</i>   | 0.8             | 0.009                 | 60*                         |
| K03A1.6                           | histone 38                                                              | <i>his-38</i>  | 0.6             | 0.011                 | -18                         |

|            |                                                                           |                |     |       |      |
|------------|---------------------------------------------------------------------------|----------------|-----|-------|------|
| K08E7.3    | lethal 99                                                                 | <i>let-99</i>  | 0.7 | 0.000 | -4   |
| B0495.4    | NA(+)/H(+) exchanger 2                                                    | <i>nhx-2</i>   | 0.3 | 0.000 | 31*  |
| T17E9.2    | N-myristoyl transferase homolog 1                                         | <i>nmt-1</i>   | 0.7 | 0.016 | 100* |
| C32E8.8    | patched related family 2                                                  | <i>ptr-2</i>   | 0.7 | 0.004 | 50*  |
| K01G5.4    | associated with RAN (nuclear import/export) function 1                    | <i>ran-1</i>   | 0.8 | 0.004 | -41  |
| F23F12.6   | proteasome regulatory particle, ATPase-like 3                             | <i>rpt-3</i>   | 0.8 | 0.004 | 62*  |
| W02B12.3   | SR protein (splicing factor) 1                                            | <i>rsp-1</i>   | 0.7 | 0.018 | 100* |
| W02B12.2   | SR protein (splicing factor) 2                                            | <i>rsp-2</i>   | 0.8 | 0.012 | -34  |
| F10G7.4    | yeast SCC (mitotic condensin subunit) homolog 1                           | <i>scc-1</i>   | 0.8 | 0.015 | 100* |
| Y41D4B.12  | SET (trithorax/polycomb) domain containing 23                             | <i>set-23</i>  | 0.3 | 0.003 | -22  |
| C54H2.5    | surfeit homolog 4                                                         | <i>sft-4</i>   | 0.6 | 0.016 | 52*  |
| F55A11.2   | syntaxin 3                                                                | <i>syn-3</i>   | 0.9 | 0.005 | 100* |
| C14B1.4    | temporarily assigned gene name 125                                        | <i>tag-125</i> | 0.8 | 0.009 | 100* |
| F29B9.6    | ubiquitin-conjugating enzyme 9                                            | <i>ubc-9</i>   | 0.7 | 0.016 | 72*  |
| F19B6.2    | ubiquitin fusion degradation (yeast UFD homolog) 1                        | <i>ufd-1</i>   | 0.8 | 0.015 | -8   |
| R10E11.8   | vacuolar H ATPase 1                                                       | <i>vha-1</i>   | 0.8 | 0.010 | -100 |
| F46F11.5   | vacuolar H ATPase 10                                                      | <i>vha-10</i>  | 0.6 | 0.004 | -30  |
| Y49A3A.2   | vacuolar H ATPase 13                                                      | <i>vha-13</i>  | 0.6 | 0.011 | -42  |
| F49C12.13  | vacuolar H ATPase 17                                                      | <i>vha-17</i>  | 0.8 | 0.012 | -67  |
| C29E4.8    | <i>adenylate kinase</i>                                                   |                | 0.6 | 0.010 | 5    |
| F44F4.2    | <i>alternative splicing factor SRp55/B52/SRp75 (RRM superfamily)</i>      |                | 0.8 | 0.005 | 5    |
| C18E9.6    | <i>translocase of outer mitochondrial membrane complex, subunit TOM40</i> |                | 0.6 | 0.008 | 11   |
| K08D12.3   | <i>E3 ubiquitin ligase interacting with arginine methyltransferase</i>    |                | 0.7 | 0.005 | -23  |
| Y54E10BR.5 | <i>signal peptidase I</i>                                                 |                | 0.8 | 0.018 | 72   |
| F43G9.5    | <i>mRNA cleavage factor I subunit</i>                                     |                | 0.6 | 0.001 | 19   |
| F55A12.8   | <i>predicted P-loop ATPase fused to an acetyltransferase</i>              |                | 0.7 | 0.005 | 32   |
| H41C03.1   | <i>phosphatidylinositol transfer protein SEC14 and related proteins</i>   |                | 0.4 | 0.008 | 20   |
| R06C7.5    | <i>adenylosuccinate lyase</i>                                             |                | 0.6 | 0.002 | 37*  |
| C06E7.1    | <i>S-adenosylmethionine synthetase</i>                                    |                | 0.6 | 0.009 | 41   |
| Y105C5B.12 | <i>unknown</i>                                                            |                | 0.6 | 0.007 | 16   |
| F32D8.5    | <i>unknown</i>                                                            |                | 0.7 | 0.004 | 32   |
| C53H9.2    | <i>unknown</i>                                                            |                | 0.5 | 0.013 | 5    |
| C50E3.5    | <i>unknown</i>                                                            |                | 0.7 | 0.017 | 96*  |
| F37B12.1   | <i>unknown</i>                                                            |                | 0.3 | 0.006 | 34   |
| W03F9.2    | <i>unknown</i>                                                            |                | 0.7 | 0.005 | -5   |
| C09H10.10  | <i>unknown</i>                                                            |                | 0.6 | 0.001 | 93*  |
| F33H1.3    | <i>unknown</i>                                                            |                | 0.8 | 0.014 | -35  |
| Y110A7A.19 | <i>unknown</i>                                                            |                | 0.7 | 0.018 | -7   |

<sup>a</sup> This table shows subsets of down-regulated genes involved in selected functional classes. Significant genes and fold change were determined by SAM. Functional classification was determined by DAVID.

<sup>b</sup> The predicted gene titles for unknown genes are shown in Italics.

<sup>c</sup> Fold change under oxidative stress.

<sup>d</sup> Determined by T-test.

<sup>e</sup> % inhibition effect of *skn-1* knockdown.

Negative value means *skn-1* RNAi further decreases the expression compared to oxidative-stressed control.

Asterisk (\*) indicates the % effect of *skn-1* knockdown is statistically significant (SAM).

**Table S3. Comparison of expression levels of selected genes between microarray and quantitative RT-PCR**

| Gene Name       | Microarray <sup>a</sup> |         |         | qRT-PCR <sup>b</sup> |        |       | qRT-PCR <sup>b</sup> |      |      |
|-----------------|-------------------------|---------|---------|----------------------|--------|-------|----------------------|------|------|
|                 | C                       | O       | SO      | C                    | O      | SO    | C                    | P    | SP   |
| <i>gst-4</i>    | 365.45                  | 4528.35 | 1240.40 | 1.00                 | 220.69 | 7.26  | 1.00                 | 6.00 | 0.54 |
| <i>hsp-16.2</i> | 15.58                   | 58.28   | 221.10  | 1.00                 | 162.43 | 24.07 | 1.00                 | 1.99 | 1.84 |
| <i>nlp-7</i>    | 133.18                  | 154.20  | 122.30  | 1.00                 | 22.37  | 2.26  | 1.00                 | 1.60 | 1.56 |
| <i>cup-4</i>    | 65.85                   | 101.15  | 61.53   | 1.00                 | 4.55   | 1.87  | 1.00                 | 1.36 | 1.99 |
| <i>nhx-2</i>    | 113.00                  | 28.38   | 54.33   | 1.00                 | 0.03   | 0.36  | 1.00                 | 1.03 | 0.99 |
| <i>ent-1</i>    | 1058.33                 | 681.50  | 918.23  | 1.00                 | 0.59   | 2.23  | 1.00                 | 0.60 | 0.92 |

<sup>a</sup> Average signal intensities of each gene in each group.

<sup>b</sup> Relative expression compared to C.

C: unstressed control.

O: worms stressed with 6 hours of hyperbaric oxygen exposure

SO: worms treated with *skn-1* RNAi and stressed with 6 hours of hyperbaric oxygen exposure.

P: worms stressed with 6 hours of 20 mM paraquat exposure.

SP: worms treated with *skn-1* RNAi and stressed with 6 hours of 20 mM paraquat exposure.

**Table S4. Overlaps Between Genes Regulated by Oxidative Stress and Aging**

| Sequence Name                                 | Gene Name                                                        | Gene Symbol     | Biological Function          |
|-----------------------------------------------|------------------------------------------------------------------|-----------------|------------------------------|
| <b>Up-regulated genes by oxidative stress</b> |                                                                  |                 |                              |
| C05E4.9                                       | GEX interacting protein 7                                        | <i>gei-7</i>    | metabolism                   |
| C10H11.3                                      | UDP-glucuronosyltransferase 25                                   | <i>ugt-25</i>   | metabolism                   |
| F10D2.11                                      | UDP-glucuronosyltransferase 41                                   | <i>ugt-41</i>   | metabolism                   |
| C45B11.3                                      | dehydrogenases, short chain 18                                   | <i>dhs-18</i>   | metabolism                   |
| K01C8.1                                       | <i>threonine/serine dehydratases</i>                             |                 | metabolism                   |
| R04B5.5                                       | <i>sorbitol dehydrogenase</i>                                    |                 | metabolism                   |
| Y48A6B.9                                      | <i>Zn<sup>2+</sup> binding dehydrogenase</i>                     |                 | metabolism                   |
| C17C3.1                                       | <i>acyl-CoA thioesterase</i>                                     |                 | acyl-CoA metabolism          |
| C12C8.2                                       | <i>cystathionine beta-lyases/<br/>cystathionine gamma-lyases</i> |                 | amino acid metabolism        |
| Y22F5A.5                                      | lysozyme 2                                                       | <i>lys-2</i>    | carbohydrate metabolism      |
| C02A12.4                                      | lysozyme 7                                                       | <i>lys-7</i>    | carbohydrate metabolism      |
| C17G10.5                                      | lysozyme 8                                                       | <i>lys-8</i>    | carbohydrate metabolism      |
| C25A8.4                                       | <i>chitinase</i>                                                 |                 | carbohydrate metabolism      |
| C50F7.10                                      | <i>beta-glucosidase,</i>                                         |                 | carbohydrate metabolism      |
| K10B3.6                                       | <i>predicted starch-binding protein</i>                          |                 | carbohydrate metabolism      |
| R11F4.1                                       | <i>ribulose kinase and related<br/>carbohydrate kinases</i>      |                 | carbohydrate metabolism      |
| F01G10.2                                      | enoyl-CoA hydratase 8                                            | <i>ech-8</i>    | fatty acid metabolism        |
| F01G10.3                                      | enoyl-CoA hydratase 9                                            | <i>ech-9</i>    | fatty acid metabolism        |
| F58F9.7                                       | <i>pristanoyl-CoA/acyl-CoA oxidase</i>                           |                 | fatty acid metabolism        |
| H17B01.3                                      | lipase related 14                                                | <i>lips-14</i>  | lipid catabolism             |
| W02A2.1                                       | fatty acid desaturase 2                                          | <i>fat-2</i>    | lipid metabolism             |
| W06D4.1                                       | homogentisate oxidase 1                                          | <i>hgo-1</i>    | L-phenylalanine catabolism   |
| ZK1058.6                                      | nitrilase 1                                                      | <i>nit-1</i>    | nitrogen compound metabolism |
| K02D7.1                                       | <i>purine nucleoside phosphorylase</i>                           |                 | nucleic acid metabolism      |
| F43E2.5                                       | <i>peptide methionine sulfoxide reductase</i>                    |                 | protein metabolism           |
| C28C12.5                                      | saposin-like protein family 8                                    | <i>spp-8</i>    | growth                       |
| C37A5.8                                       | FIP related 24                                                   | <i>fipr-24</i>  | growth                       |
| C49G7.4                                       | pharyngeal gland toxin-related 3                                 | <i>phat-3</i>   | growth                       |
| F40E10.3                                      | calsequestrin 1                                                  | <i>csq-1</i>    | growth                       |
| K02E7.9                                       | BTB domain protein 10                                            | <i>btb-10</i>   | growth                       |
| R09B5.9                                       | caenacin 4                                                       | <i>cnc-4</i>    | growth                       |
| R06A4.6                                       | SKN-1 dependent zygotic transcript 26                            | <i>sdz-26</i>   | development                  |
| T04D3.2                                       | SKN-1 dependent zygotic transcript 30                            | <i>sdz-30</i>   | development                  |
| F37B4.7                                       | folate transporter family 2                                      | <i>folt-2</i>   | transport                    |
| R07E3.4                                       | <i>mitochondrial ADP/ATP carrier proteins</i>                    |                 | transport                    |
| M110.1                                        | collagen 76                                                      | <i>col-76</i>   | phosphate transport          |
| M195.1                                        | collagen 77                                                      | <i>col-77</i>   | phosphate transport          |
| F17E9.1                                       | collagen 116                                                     | <i>col-116</i>  | phosphate transport          |
| C09H5.2                                       | <i>Na<sup>+</sup>/K<sup>+</sup> ATPase, alpha subunit</i>        |                 | cation transport             |
| F55F3.3                                       | <i>Na<sup>+</sup>/K<sup>+</sup> ATPase, beta subunit</i>         |                 | cation transport             |
| R08F11.3                                      | cytochrome P450 family 33C8                                      | <i>cyp-33C8</i> | electron transport           |
| B0213.15                                      | cytochrome P450 family 34A9                                      | <i>cyp-34A9</i> | electron transport           |
| C24G6.6                                       | <i>flavin-containing amine oxidase</i>                           |                 | electron transport           |
| C37H5.9                                       | nematode astacin protease 9                                      | <i>nas-9</i>    | proteolysis                  |
| C52E4.1                                       | cysteine protease related 1                                      | <i>cpr-1</i>    | proteolysis                  |

|           |                                                                 |                 |                                   |
|-----------|-----------------------------------------------------------------|-----------------|-----------------------------------|
| F44C4.3   | cysteine protease related 4                                     | <i>cpr-4</i>    | proteolysis                       |
| T28H10.3  | <i>asparaginyl peptidase</i>                                    |                 | proteolysis                       |
| F10D7.3   | <i>glutaredoxin and related proteins</i>                        |                 | cell redox homeostasis            |
| W01B11.6  | <i>thioredoxin</i>                                              |                 | cell redox homeostasis            |
| ZC581.1   | NEK like 2                                                      | <i>nekl-2</i>   | body morphogenesis                |
| B0286.3   | <i>phosphoribosylamidoimidazole-succinocarboxamide synthase</i> |                 | de novo' IMP biosynthesis         |
| C02C2.3   | coelomocyte uptake defective 7                                  | <i>cup-4</i>    | endocytosis                       |
| D1054.8   | <i>reductase</i>                                                |                 | enterobactin biosynthetic process |
| T27E4.8   | heat shock protein 16.1                                         | <i>hsp-16.1</i> | heat shock response               |
| T04H1.9   | beta-tubulin                                                    | <i>tbb-6</i>    | microtubule-based movement        |
| B0213.4   | neuropeptide-like protein                                       | <i>nlp-29</i>   | nematode larval development       |
| C28H8.11  | <i>tryptophan 2,3-deoxygenase</i>                               |                 | oxidation reduction               |
| ZK1251.2  | insulin related 7                                               | <i>ins-7</i>    | physiological process             |
| C54D10.1  | cadmium responsive 2                                            | <i>cdr-2</i>    |                                   |
| F49E11.10 | SCP-like extracellular protein 2                                | <i>scl-2</i>    |                                   |
| W06B11.3  | DAF-16/FOXO controlled, germline tumor affecting 11             | <i>dct-11</i>   |                                   |
| K10D11.1  | downstream of DAF-16 17                                         | <i>dod-17</i>   |                                   |
| C24B9.9   | downstream of DAF-16 3                                          | <i>dod-3</i>    |                                   |
| T12B5.10  | F-box A protein 60                                              | <i>fbxa-60</i>  |                                   |
| C06H5.1   | F-box A protein 156                                             | <i>fbxa-156</i> |                                   |
| F54D10.2  | F-box B protein 24                                              | <i>fbxb-24</i>  |                                   |
| K05F6.7   | F-box B protein 54                                              | <i>fbxb-54</i>  |                                   |
| F40F4.1   | F-box B protein 71                                              | <i>fbxb-71</i>  |                                   |
| C32B5.14  | F-box C protein 18                                              | <i>fbxc-18</i>  |                                   |
| R07C3.2   | F-box C protein 36                                              | <i>fbxc-36</i>  |                                   |
| K08F4.7   | glutathione S-transferase 4                                     | <i>gst-4</i>    |                                   |
| T26C5.1   | glutathione S-transferase 13                                    | <i>gst-13</i>   |                                   |
| F21H7.1   | glutathione S-transferase 22                                    | <i>gst-22</i>   |                                   |
| ZK1320.1  | glutathione S-transferase keppa protein 1                       | <i>gstk-1</i>   |                                   |
| C45G7.3   | invertebrate lysozyme 3                                         | <i>ilys-3</i>   |                                   |
| K11D12.3  | serpentine receptor, class R 4                                  | <i>srr-4</i>    |                                   |
| F28D1.5   | thaumatin family 2                                              | <i>thn-2</i>    |                                   |
| F36A4.8   | trans thyretin-related family domain 20                         | <i>ttr-20</i>   |                                   |
| T21F4.1   | <i>arginase</i>                                                 |                 |                                   |
| Y48A6B.7  | <i>cytosine deaminase FCY1 and related enzymes</i>              |                 |                                   |
| C01B10.3  | <i>inositol polyphosphate 5-phosphatase, type 1</i>             |                 |                                   |
| C08F11.13 | <i>integral membrane O-acyltransferase</i>                      |                 |                                   |
| ZK550.6   | <i>peroxisomal phytanoyl-CoA hydroxylase</i>                    |                 |                                   |
| Y69E1A.5  | <i>phosphatidylethanolamine binding protein</i>                 |                 |                                   |
| C42D4.1   | <i>predicted alpha-helical protein</i>                          |                 |                                   |
| T24A6.7   | <i>predicted riboflavin biosynthesis protein</i>                |                 |                                   |
| F21A3.2   | <i>purple acid phosphatase</i>                                  |                 |                                   |
| H28G03.1  | <i>RRM domain</i>                                               |                 |                                   |
| F01D5.1   | <i>secreted surface protein</i>                                 |                 |                                   |
| F01D5.2   | <i>secreted surface protein</i>                                 |                 |                                   |
| F01D5.5   | <i>secreted surface protein</i>                                 |                 |                                   |
| C35B1.5   | <i>thioredoxin, nucleoredoxin and related proteins</i>          |                 |                                   |

|            |                                     |
|------------|-------------------------------------|
| F22B8.7    | <i>uncharacterized Fe-S protein</i> |
| B0281.3    | <i>unknown</i>                      |
| C07H4.1    | <i>unknown</i>                      |
| C17H12.8   | <i>unknown</i>                      |
| C18A11.1   | <i>unknown</i>                      |
| C32H11.4   | <i>unknown</i>                      |
| C33A12.4   | <i>unknown</i>                      |
| C34C6.7    | <i>unknown</i>                      |
| C39E9.8    | <i>unknown</i>                      |
| C49G7.5    | <i>unknown</i>                      |
| C50F7.5    | <i>unknown</i>                      |
| C53B7.3    | <i>unknown</i>                      |
| F08B12.4   | <i>unknown</i>                      |
| F09B12.3   | <i>unknown</i>                      |
| F13D12.3   | <i>unknown</i>                      |
| F15E6.4    | <i>unknown</i>                      |
| F17H10.2   | <i>unknown</i>                      |
| F23F1.7    | <i>unknown</i>                      |
| F29G9.1    | <i>unknown</i>                      |
| F41B4.3    | <i>unknown</i>                      |
| F43H9.4    | <i>unknown</i>                      |
| F47B10.9   | <i>unknown</i>                      |
| F47B8.8    | <i>unknown</i>                      |
| F48D6.4    | <i>unknown</i>                      |
| F52E1.5    | <i>unknown</i>                      |
| F53A9.6    | <i>unknown</i>                      |
| F54D5.4    | <i>unknown</i>                      |
| F55G11.4   | <i>unknown</i>                      |
| F55G11.8   | <i>unknown</i>                      |
| F58E10.7   | <i>unknown</i>                      |
| F59E11.7   | <i>unknown</i>                      |
| R10D12.9   | <i>unknown</i>                      |
| T11B7.2    | <i>unknown</i>                      |
| T12G3.1    | <i>unknown</i>                      |
| T24B8.5    | <i>unknown</i>                      |
| T28F4.5    | <i>unknown</i>                      |
| W01F3.2    | <i>unknown</i>                      |
| W04B5.1    | <i>unknown</i>                      |
| Y106G6H.10 | <i>unknown</i>                      |
| Y75B8A.23  | <i>unknown</i>                      |
| ZC395.5    | <i>unknown</i>                      |
| ZC410.5    | <i>unknown</i>                      |

**Down-regulated genes by oxidative stress**

|           |             |               |                     |
|-----------|-------------|---------------|---------------------|
| F11H8.3   | collagen 8  | <i>col-8</i>  | phosphate transport |
| B0222.8   | collagen 10 | <i>col-10</i> | phosphate transport |
| F15H10.1  | collagen 12 | <i>col-12</i> | phosphate transport |
| F11G11.10 | collagen 17 | <i>col-17</i> | phosphate transport |
| F11G11.11 | collagen 20 | <i>col-20</i> | phosphate transport |
| ZC513.8   | collagen 43 | <i>col-43</i> | phosphate transport |
| W05G11.3  | collagen 88 | <i>col-88</i> | phosphate transport |
| W05B2.5   | collagen 93 | <i>col-93</i> | phosphate transport |



|          |                                                                               |                 |                                |
|----------|-------------------------------------------------------------------------------|-----------------|--------------------------------|
| F14F7.1  | collagen 98                                                                   | <i>col-98</i>   | phosphate transport            |
| C29F4.1  | collagen 125                                                                  | <i>col-125</i>  | phosphate transport            |
| B0222.6  | collagen 144                                                                  | <i>col-144</i>  | phosphate transport            |
| F15A2.1  | collagen 184                                                                  | <i>col-184</i>  | phosphate transport            |
| F56B3.1  | collagen 103                                                                  | <i>col-103</i>  | phosphate transport            |
| K02D7.3  | collagen 101                                                                  | <i>col-101</i>  | phosphate transport            |
| T10E10.1 | collagen 168                                                                  | <i>col-168</i>  | phosphate transport            |
| W03G11.1 | collagen 181                                                                  | <i>col-181</i>  | phosphate transport            |
| C12D12.2 | glutamate transporter family 1                                                | <i>glt-1</i>    | dicarboxylic acid transport    |
| Y49A3A.2 | vacuolar H ATPase 13                                                          | <i>vha-13</i>   | proton transport               |
| W02D3.5  | lipid binding protein 6                                                       | <i>lbp-6</i>    | transport                      |
| F10C1.2  | intermediate filament, B 1                                                    | <i>ifb-1</i>    | body morphogenesis             |
| F25B4.9  | C-type lectin 1                                                               | <i>clcc-1</i>   | body morphogenesis             |
| Y41E3.2  | dumpy 4                                                                       | <i>dyp-4</i>    | body morphogenesis             |
| F30B5.1  | dumpy 13                                                                      | <i>dyp-13</i>   | body morphogenesis             |
| F08H9.7  | C-type lectin 56                                                              | <i>clcc-56</i>  | body morphogenesis             |
| ZK858.3  | C-type lectin 91                                                              | <i>clcc-91</i>  | body morphogenesis             |
| F01F1.6  | aldehyde dehydrogenase 9                                                      | <i>alh-9</i>    | metabolism                     |
| F54D11.1 | phosphoethanolamine methyltransferase                                         | <i>pmt-2</i>    | metabolism                     |
| Y76A2B.3 | fatty acid CoA synthetase family 5                                            | <i>acs-5</i>    | metabolism                     |
| F47B10.1 | <i>succinyl-CoA synthetase, beta subunit</i>                                  |                 | metabolism                     |
| K09H11.7 | <i>p-nitropheny phosphatase</i>                                               |                 | metabolism                     |
| F22B8.6  | <i>cystathionine beta-lyases/<br/>cystathionine gamma-lyases</i>              |                 | amino acid metabolism          |
| C16A3.10 | <i>ornithine aminotransferase</i>                                             |                 | arginine metabolic process     |
| F52A8.5  | <i>glycine cleavage system H protein</i>                                      |                 | glycine catabolism             |
| R12C12.1 | <i>glycine dehydrogenase</i>                                                  |                 | glycine metabolism             |
| T05A12.2 | trehalase 2                                                                   | <i>tre-2</i>    | trehalose metabolism           |
| F11C1.3  | <i>plasma membrane glycoprotein CD36<br/>and related membrane receptors</i>   |                 | cell adhesion                  |
| T25C12.3 | <i>unknown</i>                                                                |                 | cell adhesion                  |
| W05E7.1  | groundhog 3                                                                   | <i>grd-3</i>    | cell communication             |
| F41E6.2  | groundhog 5                                                                   | <i>grd-5</i>    | cell communication             |
| R09B5.8  | caenacin 3                                                                    | <i>cnc-3</i>    | development                    |
| F41E7.8  | caenacin 8                                                                    | <i>cnc-8</i>    | development                    |
| C36A4.1  | cytochrome P450 family 25A1                                                   | <i>cyp-25A1</i> | electron transport             |
| C36A4.2  | cytochrome P450 family 25A2                                                   | <i>cyp-25A2</i> | electron transport             |
| C25F6.3  | dihydropyrimidine dehydrogenase 1                                             | <i>dpyd-1</i>   | electron transport             |
| C15H9.7  | <i>L-kynurenine hydrolase</i>                                                 |                 | NAD biosynthesis               |
| K03A1.6  | histone 38                                                                    | <i>his-38</i>   | nucleosome assembly            |
| C06E7.1  | <i>S-adenosylmethionine synthetase</i>                                        |                 | one-carbon compound metabolism |
| F32A5.3  | <i>serine carboxypeptidases</i>                                               |                 | proteolysis                    |
| R07B1.4  | glutathione S-transferase 36                                                  | <i>gst-36</i>   |                                |
| T19D7.1  | ligand-gated ion channel 32                                                   | <i>lgc-32</i>   |                                |
| C44C1.5  | <i>alpha/beta hydrolase</i>                                                   |                 |                                |
| F32B5.1  | <i>creatine kinases</i>                                                       |                 |                                |
| T25B9.1  | <i>glycine C-acetyltransferase/<br/>2-amino-3-ketobutyrate-CoA ligase</i>     |                 |                                |
| K09G1.1  | <i>members of chemokine-like factor super family<br/>and related proteins</i> |                 |                                |
| ZK682.2  | <i>permease of the major facilitator superfamily</i>                          |                 |                                |

|          |                |
|----------|----------------|
| C52G5.2  | <i>unknown</i> |
| D1086.3  | <i>unknown</i> |
| F16B4.4  | <i>unknown</i> |
| F46F2.3  | <i>unknown</i> |
| F55H12.4 | <i>unknown</i> |
| K08H2.3  | <i>unknown</i> |
| T03G11.6 | <i>unknown</i> |
| T28D6.3  | <i>unknown</i> |
| Y25C1A.6 | <i>unknown</i> |
| ZK1307.1 | <i>unknown</i> |
| ZK512.7  | <i>unknown</i> |

---

The predicted gene title for unknown gene is shown in *Italic*.

---

**Table S5. Overlaps Between Genes Regulated by Oxidative Stress and *daf-16***

| Sequence Name                                        | Gene Name                                                              | Gene Symbol     | Biological Function            |
|------------------------------------------------------|------------------------------------------------------------------------|-----------------|--------------------------------|
| <b><i>Up-regulated genes by oxidative stress</i></b> |                                                                        |                 |                                |
| Y54G11A.5                                            | catalase 2                                                             | <i>ctl-2</i>    | response to oxidative stress   |
| Y54G11A.6                                            | catalase 3                                                             | <i>ctl-3</i>    | response to oxidative stress   |
| T27E4.8                                              | heat shock protein 16.1                                                | <i>hsp-16.1</i> | heat shock response            |
| Y46H3A.3                                             | heat shock protein 16.2                                                | <i>hsp-16.2</i> | heat shock response            |
| K11G9.6                                              | metallothionein 1                                                      | <i>mtl-1</i>    | response to heat               |
| B0213.15                                             | cytochrome P450 family 34A9                                            | <i>cyp-34A9</i> | electron transport             |
| C15H9.1                                              | nicotinamide nucleotide transhydrogenase 1                             | <i>nnt-1</i>    | electron transport             |
| C24G6.6                                              | <i>flavin-containing amine oxidase</i>                                 |                 | electron transport             |
| F18E3.7                                              | <i>D-aspartate oxidase</i>                                             |                 | electron transport             |
| F47B8.4                                              | <i>glutaredoxin-related protein</i>                                    |                 | electron transport             |
| C46F4.2                                              | fatty acid CoA synthetase family 17                                    | <i>acs-17</i>   | metabolism                     |
| C45B11.3                                             | dehydrogenases, short chain 18                                         | <i>dhs-18</i>   | metabolism                     |
| C05E4.9                                              | GEX interacting protein 7                                              | <i>gei-7</i>    | metabolism                     |
| ZK54.2                                               | trehalose 6-phosphate synthase 1                                       | <i>tps-1</i>    | metabolism                     |
| F10D2.11                                             | UDP-glucuronosyltransferase 41                                         | <i>ugt-41</i>   | metabolism                     |
| M02D8.4                                              | <i>asparagine synthase</i>                                             |                 | metabolism                     |
| Y51A2B.1                                             | <i>predicted riboflavin biosynthesis protein</i>                       |                 | metabolism                     |
| C12C8.2                                              | <i>cystathionine beta-lyases/cystathionine gamma-synthases</i>         |                 | amino acid metabolism          |
| T21C12.2                                             | 4-hydroxyphenylpyruvate dioxygenase 1                                  | <i>hpd-1</i>    | aromatic amino acid metabolism |
| C37H5.2                                              | <i>predicted hydrolase/acyltransferase</i>                             |                 | aromatic compound metabolism   |
| C02A12.4                                             | lysozyme 7                                                             | <i>lys-7</i>    | carbohydrate metabolism        |
| C17G10.5                                             | lysozyme 8                                                             | <i>lys-8</i>    | carbohydrate metabolism        |
| C50F7.10                                             | <i>beta-glucosidase, lactase phlorizinhydrolase</i>                    |                 | carbohydrate metabolism        |
| W06D4.1                                              | homogentisate oxidase 1                                                | <i>hgo-1</i>    | L-phenylalanine catabolism     |
| C54C8.9                                              | neuropeptide-like protein 39                                           | <i>nlp-39</i>   | development                    |
| F09F7.7                                              | <i>2-Oxoglutarate- and iron-dependent dioxygenase-related proteins</i> |                 | development                    |
| C09G12.8                                             | cell death abnormality 10                                              | <i>ced-10</i>   | protein transport              |
| C52E4.1                                              | cysteine protease related 1                                            | <i>cpr-1</i>    | proteolysis                    |
| C30G7.1                                              | histone H1 like 1                                                      | <i>hil-1</i>    | nucleosome assembly            |
| ZK1251.2                                             | insulin related 7                                                      | <i>ins-7</i>    | physiological process          |
| F28D1.3                                              | thaumatin family 1                                                     | <i>thn-1</i>    | defense response               |
| B0286.3                                              | <i>phosphoribosylamidoimidazole-succinocarboxamide synthase</i>        |                 | de novo' IMP biosynthesis      |
| W01B11.6                                             | <i>thioredoxin</i>                                                     |                 | cell redox homeostasis         |
| Y56A3A.33                                            | <i>3'-5' exonuclease</i>                                               |                 | DNA repair                     |
| T21D12.9                                             | <i>membrane glycoprotein LIG-1</i>                                     |                 | regulation of cell growth      |
| F53A9.1                                              | <i>unknown</i>                                                         |                 | proteolysis                    |
| ZC247.1                                              | <i>unknown</i>                                                         |                 | cell adhesion                  |
| W06B11.3                                             | DAF-16/FOXO controlled, germline tumor affecting 11                    | <i>dct-11</i>   |                                |
| C54D10.1                                             | cadmium responsive 2                                                   | <i>cdr-2</i>    |                                |
| F56D6.2                                              | C-type lectin 67                                                       | <i>clec-67</i>  |                                |
| K10D11.1                                             | downstream of DAF-16 17                                                | <i>dod-17</i>   |                                |

|           |                                                  |                |
|-----------|--------------------------------------------------|----------------|
| C24B9.9   | downstream of DAF-16 3                           | <i>dod-3</i>   |
| F40F4.1   | F-box B protein 71                               | <i>fbxb-71</i> |
| K08F4.7   | glutathione S-transferase 4                      | <i>gst-4</i>   |
| C45G7.3   | invertebrate lysozyme 3                          | <i>ilys-3</i>  |
| F47H4.10  | skp1 related 5                                   | <i>skr-5</i>   |
| F28D1.5   | thaumatin family 2                               | <i>thn-2</i>   |
| B0238.1   | <i>carboxylesterase</i>                          |                |
| C05C9.1   | <i>BPI/LBP/CETP family protein</i>               |                |
| C08E8.4   | <i>predicted riboflavin biosynthesis protein</i> |                |
| F52H3.5   | <i>TPR repeat-containing protein</i>             |                |
| T23B3.2   | <i>stress responsive protein</i>                 |                |
| ZK550.6   | <i>peroxisomal phytanoyl-CoA hydroxylase</i>     |                |
| C31A11.5  | <i>predicted acyltransferase</i>                 |                |
| C18A11.1  | <i>unknown</i>                                   |                |
| C34C6.7   | <i>unknown</i>                                   |                |
| C40H1.5   | <i>unknown</i>                                   |                |
| C50F7.5   | <i>unknown</i>                                   |                |
| C53B7.3   | <i>unknown</i>                                   |                |
| F08B12.4  | <i>unknown</i>                                   |                |
| F09B12.3  | <i>unknown</i>                                   |                |
| F09F7.6   | <i>unknown</i>                                   |                |
| F15E6.4   | <i>unknown</i>                                   |                |
| F21C10.10 | <i>unknown</i>                                   |                |
| F32A5.4   | <i>unknown</i>                                   |                |
| F36F2.2   | <i>unknown</i>                                   |                |
| F43H9.4   | <i>unknown</i>                                   |                |
| F45D3.4   | <i>unknown</i>                                   |                |
| F48D6.4   | <i>unknown</i>                                   |                |
| F54F7.3   | <i>unknown</i>                                   |                |
| JC8.8     | <i>unknown</i>                                   |                |
| K01A2.2   | <i>unknown</i>                                   |                |
| T21C9.8   | <i>unknown</i>                                   |                |
| T28F4.5   | <i>unknown</i>                                   |                |
| W05H9.1   | <i>unknown</i>                                   |                |
| Y43C5A.3  | <i>unknown</i>                                   |                |
| Y51A2D.11 | <i>unknown</i>                                   |                |
| Y51B9A.8  | <i>unknown</i>                                   |                |
| ZC395.5   | <i>unknown</i>                                   |                |
| ZC410.5   | <i>unknown</i>                                   |                |
| C08B6.10  | <i>unknown</i>                                   |                |
| C17H12.8  | <i>unknown</i>                                   |                |
| C32H11.4  | <i>unknown</i>                                   |                |
| F35E12.9  | <i>unknown</i>                                   |                |
| F36F2.1   | <i>unknown</i>                                   |                |
| F54E2.1   | <i>unknown</i>                                   |                |
| F55G11.8  | <i>unknown</i>                                   |                |
| T24B8.5   | <i>unknown</i>                                   |                |
| Y106G6H.9 | <i>unknown</i>                                   |                |

**Down-regulated genes by oxidative stress**

|          |                            |                |                        |
|----------|----------------------------|----------------|------------------------|
| K04E7.2  | oligopeptide transporter 2 | <i>opt-2</i>   | oligopeptide transport |
| T10E10.2 | collagen 167               | <i>col-167</i> | phosphate transport    |

|          |                                           |               |                            |
|----------|-------------------------------------------|---------------|----------------------------|
| C08B11.4 | nose resistant to fluoxetine 6            | <i>nrf-6</i>  | transport                  |
| T23G5.2  | <i>unknown</i>                            |               | transport                  |
| T03F6.1  | quinoid dihydropteridine reductase 1      | <i>qdpr-1</i> | metabolism                 |
| C16A3.10 | <i>ornithine aminotransferase</i>         |               | arginine metabolic process |
| C15H9.7  | <i>L-kynurenine hydrolase</i>             |               | NAD biosynthesis           |
| C25F6.3  | dihydropyrimidine dehydrogenase 1         | <i>dpyd-1</i> | electron transport         |
| F02H6.5  | <i>unknown</i>                            |               | electron transport         |
| EGAP2.3  | intestinal acid phosphatase 1             | <i>pho-1</i>  | development                |
| F58G1.4  | <i>unknown</i>                            |               | osmoregulation             |
| T16G12.1 | <i>puromycin-sensitive aminopeptidase</i> |               | proteolysis                |
| T25C12.3 | <i>unknown</i>                            |               | cell adhesion              |
| D1086.3  | <i>unknown</i>                            |               |                            |

---

The predicted gene title for unknown gene is shown in Italic.

---

**Table S6. Overlaps Among Genes Regulated by Oxidative Stress, Aging, and *daf-16***

| Sequence Name                                   | Gene Name                                                            | Gene Symbol     | Biological Function        |
|-------------------------------------------------|----------------------------------------------------------------------|-----------------|----------------------------|
| <b>Up-regulated genes by oxidative stress</b>   |                                                                      |                 |                            |
| B0213.15                                        | cytochrome P450 family 34A9                                          | <i>cyp-34A9</i> | electron transport         |
| C24G6.6                                         | <i>flavin-containing amine oxidase</i>                               |                 | electron transport         |
| C45B11.3                                        | dehydrogenases, short chain 18                                       | <i>dhs-18</i>   | metabolism                 |
| F10D2.11                                        | UDP-glucuronosyltransferase 41                                       | <i>ugt-41</i>   | metabolism                 |
| C05E4.9                                         | GEX interacting protein 7                                            | <i>gei-7</i>    | metabolism                 |
| C02A12.4                                        | lysozyme 7                                                           | <i>lys-7</i>    | carbohydrate metabolism    |
| W06D4.1                                         | homogentisate oxidase 1                                              | <i>hgo-1</i>    | L-phenylalanine catabolism |
| C17G10.5                                        | lysozyme 8                                                           | <i>lys-8</i>    | carbohydrate metabolism    |
| C50F7.10                                        | <i>beta-glucosidase,</i>                                             |                 | carbohydrate metabolism    |
| C12C8.2                                         | <i>cystathionine beta-lyases/<br/>cystathionine gamma-lyases</i>     |                 | amino acid metabolism      |
| C52E4.1                                         | cysteine protease related 1                                          | <i>cpr-1</i>    | proteolysis                |
| ZK1251.2                                        | insulin related 7                                                    | <i>ins-7</i>    | physiological process      |
| T27E4.8                                         | heat shock protein 16.1                                              | <i>hsp-16.1</i> | heat shock response        |
| B0286.3                                         | <i>phosphoribosylamidoimidazole-<br/>succinocarboxamide synthase</i> |                 | de novo' IMP biosynthesis  |
| W01B11.6                                        | <i>thioredoxin</i>                                                   |                 | cell redox homeostasis     |
| C54D10.1                                        | cadmium responsive 2                                                 | <i>cdr-2</i>    |                            |
| K08F4.7                                         | glutathione S-transferase 4                                          | <i>gst-4</i>    |                            |
| F28D1.5                                         | thaumatin family 2                                                   | <i>thn-2</i>    |                            |
| C45G7.3                                         | invertebrate lysozyme 3                                              | <i>ilys-3</i>   |                            |
| C24B9.9                                         | downstream of DAF-16 3                                               | <i>dod-3</i>    |                            |
| K10D11.1                                        | downstream of DAF-16 17                                              | <i>dod-17</i>   |                            |
| F40F4.1                                         | F-box B protein 71                                                   | <i>fbxb-71</i>  |                            |
| W06B11.3                                        | DAF-16/FOXO controlled,<br>germline tumor affecting 11               | <i>dct-11</i>   |                            |
| C17H12.8                                        | <i>unknown</i>                                                       |                 |                            |
| C18A11.1                                        | <i>unknown</i>                                                       |                 |                            |
| C32H11.4                                        | <i>unknown</i>                                                       |                 |                            |
| C34C6.7                                         | <i>unknown</i>                                                       |                 |                            |
| C50F7.5                                         | <i>unknown</i>                                                       |                 |                            |
| C53B7.3                                         | <i>unknown</i>                                                       |                 |                            |
| F08B12.4                                        | <i>unknown</i>                                                       |                 |                            |
| F09B12.3                                        | <i>unknown</i>                                                       |                 |                            |
| F15E6.4                                         | <i>unknown</i>                                                       |                 |                            |
| F43H9.4                                         | <i>unknown</i>                                                       |                 |                            |
| F48D6.4                                         | <i>unknown</i>                                                       |                 |                            |
| F55G11.8                                        | <i>unknown</i>                                                       |                 |                            |
| T24B8.5                                         | <i>unknown</i>                                                       |                 |                            |
| T28F4.5                                         | <i>unknown</i>                                                       |                 |                            |
| ZC395.5                                         | <i>unknown</i>                                                       |                 |                            |
| ZC410.5                                         | <i>unknown</i>                                                       |                 |                            |
| ZK550.6                                         | <i>peroxisomal phytanoyl-CoA hydroxylase</i>                         |                 |                            |
| <b>Down-regulated genes by oxidative stress</b> |                                                                      |                 |                            |
| C25F6.3                                         | dihydropyrimidine dehydrogenase 1                                    | <i>dpyd-1</i>   | electron transport         |
| C15H9.7                                         | <i>L-kynurenine hydrolase</i>                                        |                 | NAD biosynthesis           |
| T25C12.3                                        | <i>unknown</i>                                                       |                 | cell adhesion              |

C16A3.10 *ornithine aminotransferase*

arginine metabolic process

D1086.3 *unknown*

---

The predicted gene title for unknown gene is shown in *Italic*.

---

**Table S7. Common Genes in Oxidative Stress Response in *C. elegans* & *D. melanogaster***

| Sequence Name | Gene Name                                          | Gene Symbol     | Biological Function                   |
|---------------|----------------------------------------------------|-----------------|---------------------------------------|
| F26E4.12      | <i>glutathione peroxidase</i>                      |                 | response to oxidative stress          |
| C36A4.2       | cytochrome P450 family 25A2                        | <i>cyp-25A2</i> | electron transport                    |
| Y5H2B.5       | cytochrome P450 family 32B1                        | <i>cyp-32B1</i> | electron transport                    |
| F01D5.9       | cytochrome P450 family 37A1                        | <i>cyp-37A1</i> | electron transport                    |
| F28G4.1       | cytochrome P450 family 37B1                        | <i>cyp-37B1</i> | electron transport                    |
| C55A6.5       | SKN-1 dependent zygotic transcript 8               | <i>sdz-8</i>    | metabolism                            |
| F35H8.6       | UDP-glucuronosyltransferase 58                     | <i>ugt-58</i>   | metabolism                            |
| F13G3.5       | abnormal thermotaxis 7                             | <i>ttx-7</i>    | metabolism                            |
| C55A6.6       | <i>short chain-type dehydrogenase</i>              |                 | metabolism                            |
| F20G2.1       | <i>short chain-type dehydrogenase</i>              |                 | metabolism                            |
| C37H5.2       | <i>hydrolase/acyltransferase</i>                   |                 | aromatic compound metabolism          |
| C37H5.3       | <i>hydrolase/acyltransferase</i>                   |                 | aromatic compound metabolism          |
| T21C12.2      | 4-hydroxyphenylpyruvate dioxygenase 1              | <i>hpd-1</i>    | aromatic amino acid family metabolism |
| F22A3.6       | invertebrate lysozyme 5                            | <i>ilys-5</i>   | development                           |
| T24H10.7      | <i>Transcriptional activator of the JUN family</i> |                 | development                           |
| C09C7.1       | 2 (zwei) Ig-domain protein 4                       | <i>zig-4</i>    | neuron development                    |
| K04G2.1       | eIF2 beta translation initiation factor 1          | <i>iftb-1</i>   | translational initiation              |
| Y38C9A.2      | Caenorhabditis GTP-binding protein 1               | <i>cgp-1</i>    | protein biosynthesis                  |

The predicted gene title for unknown gene is shown in Italic.



**Table S8. Primer sets used for quantitative RT-PCR**

| <b>Gene Name</b> | <b>Primer</b> | <b>Sequence</b>                         |
|------------------|---------------|-----------------------------------------|
| <i>ama-1</i>     | forward       | 5'-CGG AGC AGC CAG GAA CTT C-3'         |
|                  | reverse       | 5'-AAC GGG AAA AAT CTT ATG AAT-3'       |
| <i>gst-4</i>     | forward       | 5'-GCT GAA GCC AAC GAC TCC AT-3'        |
|                  | reverse       | 5'-GAC CGA ATT GTT CTC CAT CGA-3'       |
| <i>hsp-16.2</i>  | forward       | 5'-TGG TGC AGT TGC TTC GAA TC-3'        |
|                  | reverse       | 5'-TTG AAC CGC TTC TTT CTT TGG-3'       |
| <i>nlp-7</i>     | forward       | 5'-GCG TTG CTC ATT GTG GTT CTC-3'       |
|                  | reverse       | 5'-TCG GCT TGC TTC AAA TAC AAA G-3'     |
| <i>cup-4</i>     | forward       | 5'-CAC TTC ATC GGC CCC AAT T-3'         |
|                  | reverse       | 5'-AAC TGA CAG TAA CTG CCA GC-3'        |
| <i>nhx-2</i>     | forward       | 5'-TGC TGC CAT GCG TCA GTA CT-3'        |
|                  | reverse       | 5'-TGA TGA ATG ATT CTG TGG CTT TTA C-3' |
| <i>ent-1</i>     | forward       | 5'-CCC GTT CAC TTC CCG TCT T-3'         |
|                  | reverse       | 5'-TCG AGG CGG CGA TAA TGA-3'           |
